# Supplementary figures and images for: Transcriptional Regulation of Reproductive Diapause in the Convergent Lady Beetle, Hippodamia convergens
Source: MDPI journal article supplement (doi:10.3390/insects13040343), 2022-03-31

Early Diapause versus Mid-Diapause

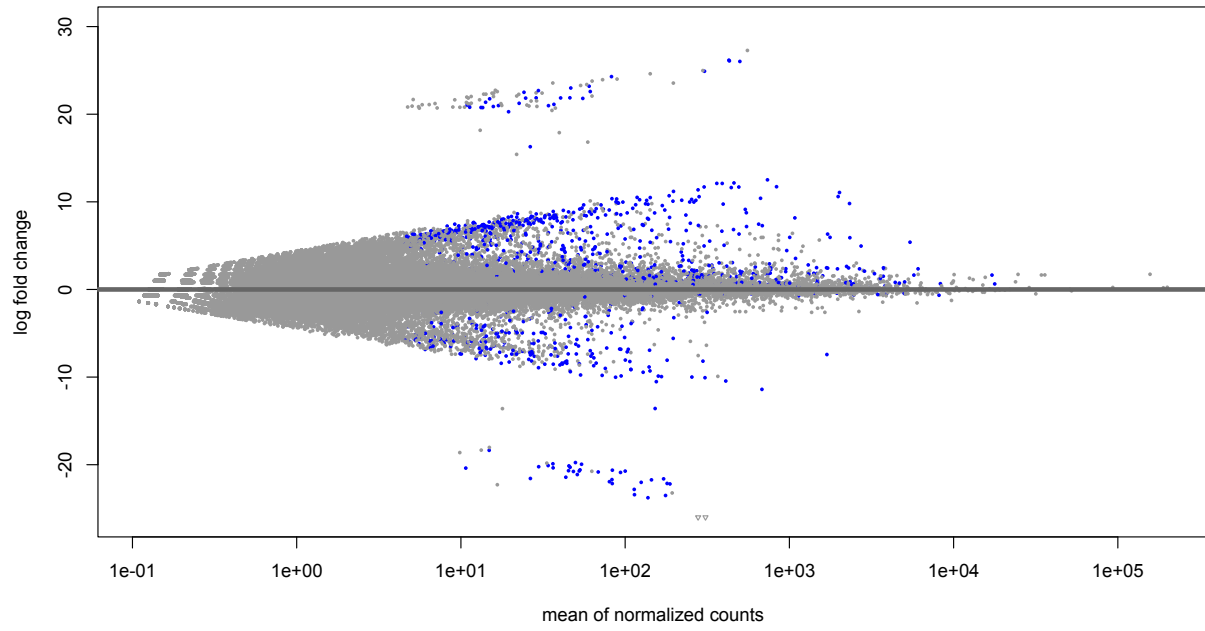

Supplement: s1 [file s1]
